# Supplementary material for: 'Role reversal' for the receptor PAR1 in sepsis-induced vascular damage
Source: Springer Nature journal article supplement (doi:10.1038/ni1525), 2007-10-28
Supplement: 41590_2007_BFni1525_MOESM4_ESM.pdf [file 41590_2007_BFni1525_MOESM4_ESM.pdf]

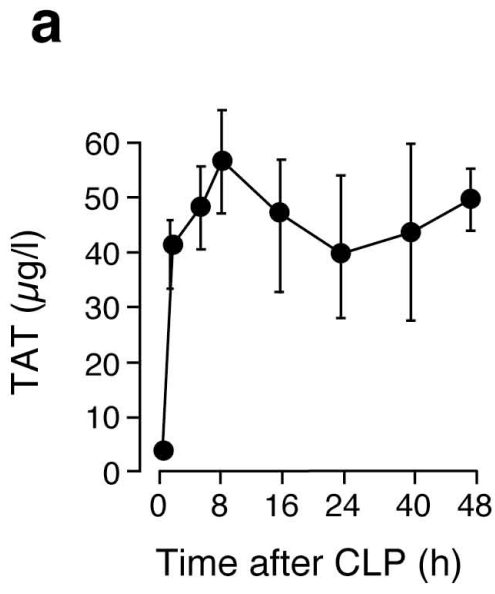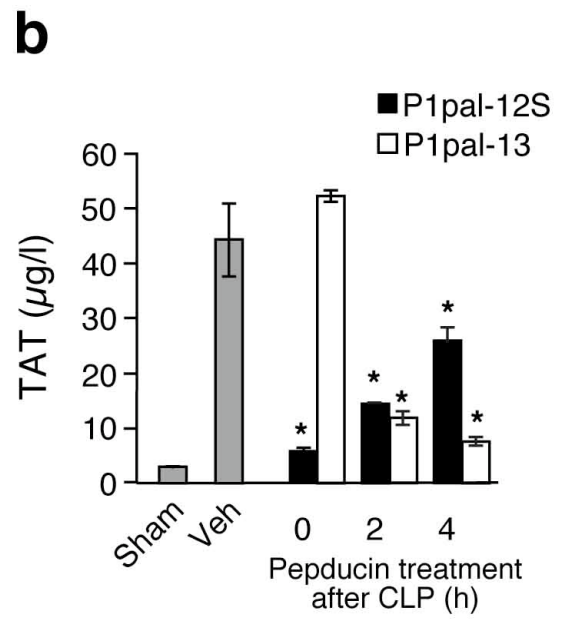

**Supplementary Figure 1. Treatment of Septic Mice with PAR1 Pepducins Inhibits**

**Formation of Thrombin-Antithrombin (TAT) Complexes.** (a) TAT complexes increase soon after CLP. Mice were subjected to CLP and blood was drawn by terminal cardiac puncture at 0-48 h after the procedure. TAT concentrations were measured by ELISA.  $n = 6$ . (b) Early treatment with the P1pal-12S antagonist pepducin or delayed treatment with the P1pal-13 agonist pepducin reduces TAT concentrations. Mice were subjected to CLP, then P1pal-12S (2.5 mg/kg) or P1pal-13 (2.5 mg/kg) were injected s.c. either immediately, 2 or 4 h after the procedure as indicated. Mice were sacrificed 48 h after CLP and blood was drawn by cardiac puncture. TAT concentrations (48 h) were measured by ELISA.  $n = 6$ , \*,  $P < 0.05$

**a****HPAEC + LPS**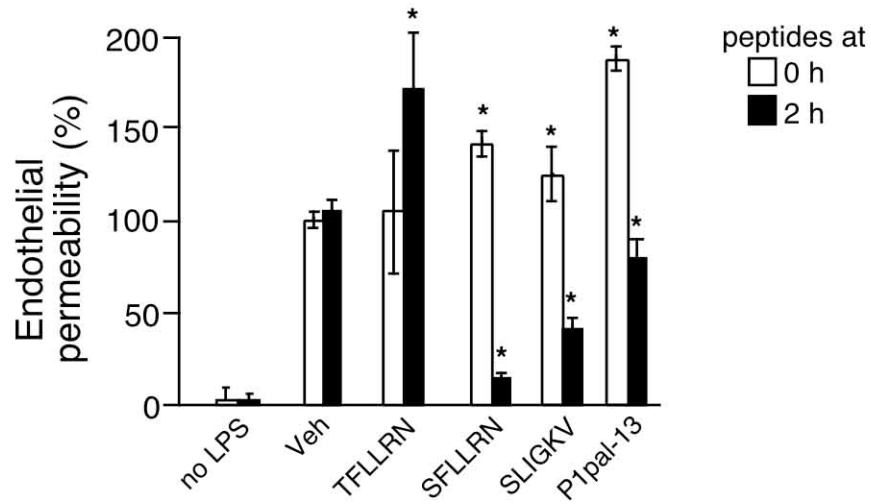**b****MCF-7**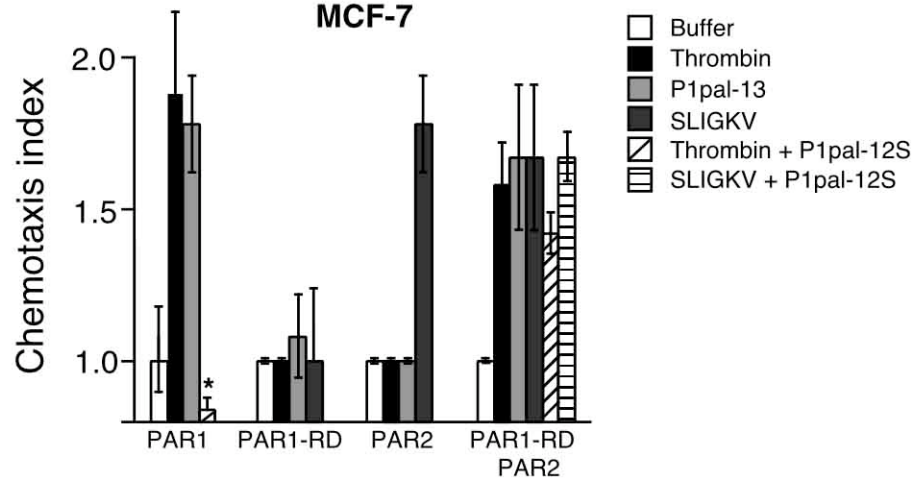**c****EA.hy926**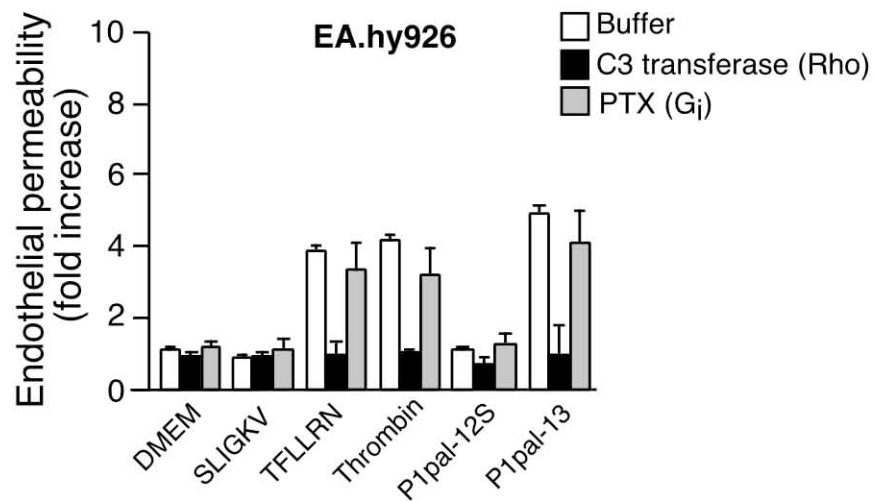

**Supplementary Figure 2. Effects of PAR Agonists on Barrier Function and PAR1-PAR2 dependent Chemotaxis.** (a) Reversal of human pulmonary artery endothelial cell (HPAEC) barrier leakage is induced by delayed treatment with PAR1 and PAR2 agonists. Confluent HPAEC monolayers were stimulated with LPS (1  $\mu\text{g/ml}$ ) and then peptide agonists (same concentrations as in **Fig. 4**) or 0.2% DMSO vehicle were added either immediately after LPS challenge (0 h) or 2 h later. Endothelial permeability was measured at the 4 h time point.  $n = 3$ , \*,  $P < 0.05$  (b) MCF7 cells, transiently transfected with PAR1 (wild-type), PAR1-RD (D199R200 $\rightarrow$ RD), and/or PAR2 (wild-type) were allowed to migrate for 24 h toward chemotactic gradients of thrombin (0.3 nM), P1pal-13 (1  $\mu\text{M}$ ), SLIGKV (10  $\mu\text{M}$ ), P1pal-12S (3  $\mu\text{M}$ ), or buffer (RPMI) using a 48-blindwell microchemotaxis chamber (Neuroprobe) equipped with 8  $\mu\text{m}$  pores. Data are expressed as chemotaxis index (mean  $\pm$  2se), which is the ratio between the distance of migration toward chemoattractants versus RPMI medium alone. ( $n = 4$ ) \*  $P < 0.01$  versus RPMI alone. (c) PAR1 agonists increase permeability of quiescent endothelium via Rho but not  $G_i$ . Confluent EA.hy926 cells were treated with DMEM containing buffer (PBS), C3 transferase (100  $\mu\text{g/ml}$ ), or pertussis toxin (PTX; 100 ng/ml) overnight. After washing, cells were exposed to SLIGKV (100  $\mu\text{M}$ ), TFLLRN (10  $\mu\text{M}$ ), thrombin (0.3 nM), P1pal-12S (0.3  $\mu\text{M}$ ) or P1pal-13 (0.3  $\mu\text{M}$ ). Endothelial permeability at 4 h was determined by Evans blue leakage into the lower wells.  $n = 3$ .

**a**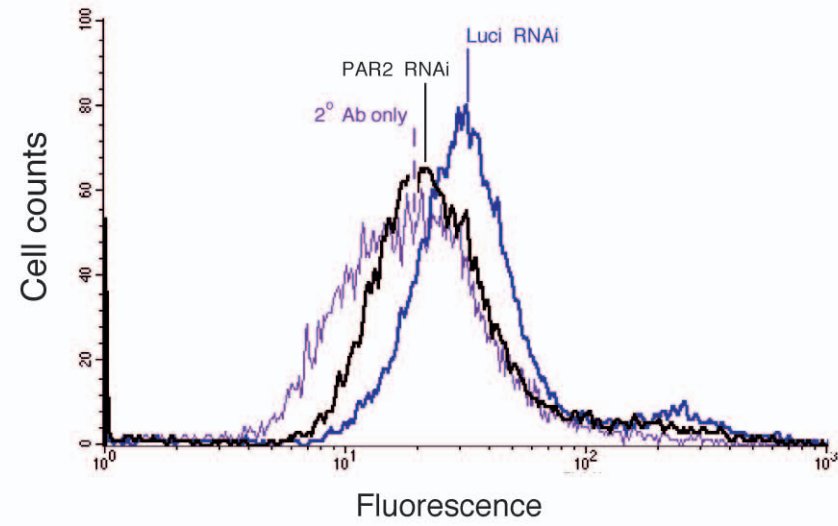**b**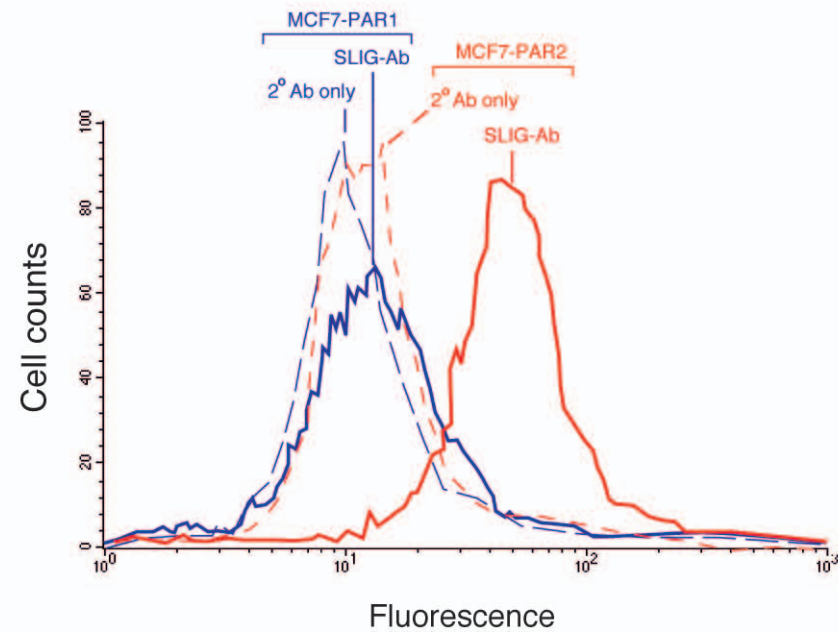

**Supplementary Figure 3. Silencing of Surface-expressed PAR2 with RNAi. (a)**

EA.hy926 endothelial cells were transfected with RNAi targeted against *Par2* or luciferase control as in **Fig. 4f,g** and FACs analysis was conducted using SLIG (PAR2-polyclonal) primary antibody (9.3 g/ml) and an anti-rabbit-FITC secondary antibody from goat (10 g/ml). These data are representative of 3 independent experiments. **(b)** As a control for the specificity of the SLIG-Ab for PAR2 relative to PAR1, MCF7 cells were transiently transfected with pcDEF3-PAR1 (blue) or pcDEF3-PAR2 (red) and FACs analysis conducted as in **a**.

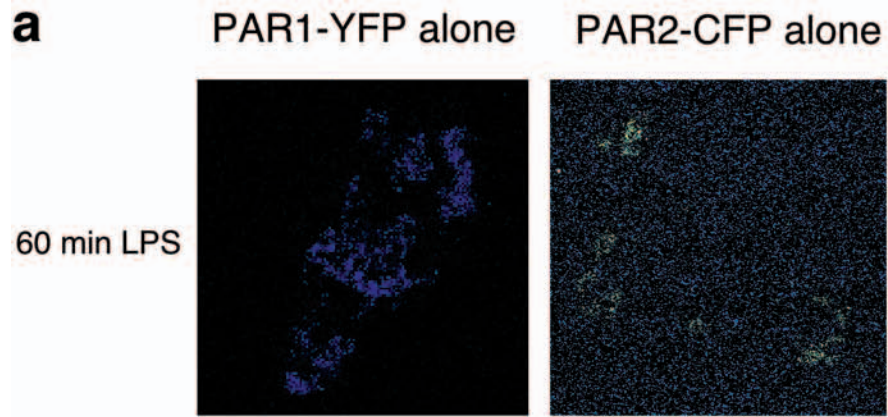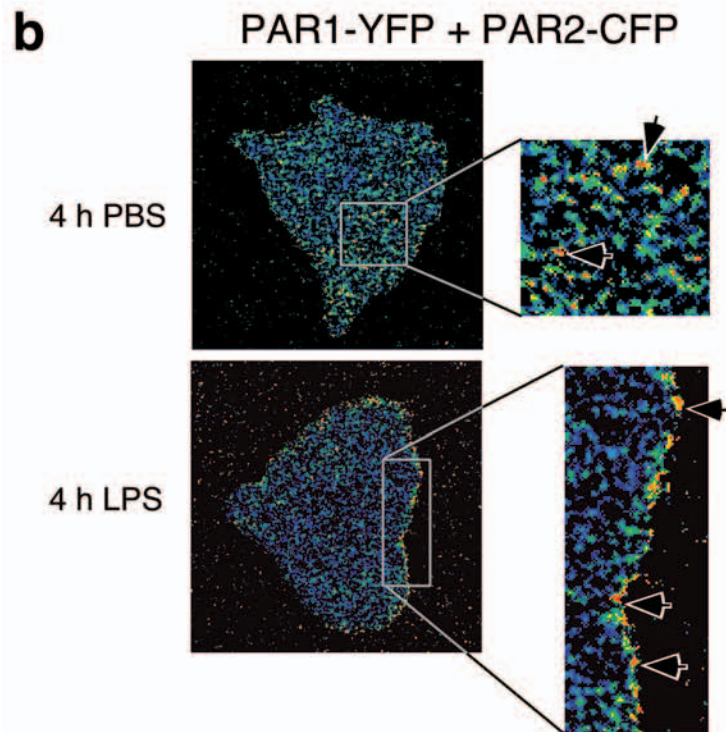

**c** Ratio of FRET Signal in Membrane / Cytosol

| Treatment        | Ave $\pm$ se    | Cells ( <i>n</i> ) | <i>P</i> value |
|------------------|-----------------|--------------------|----------------|
| buffer           | 0.30 $\pm$ 0.03 | 16                 | –              |
| 1 $\mu$ g/mL LPS | 11.3 $\pm$ 4.25 | 10                 | 0.003          |

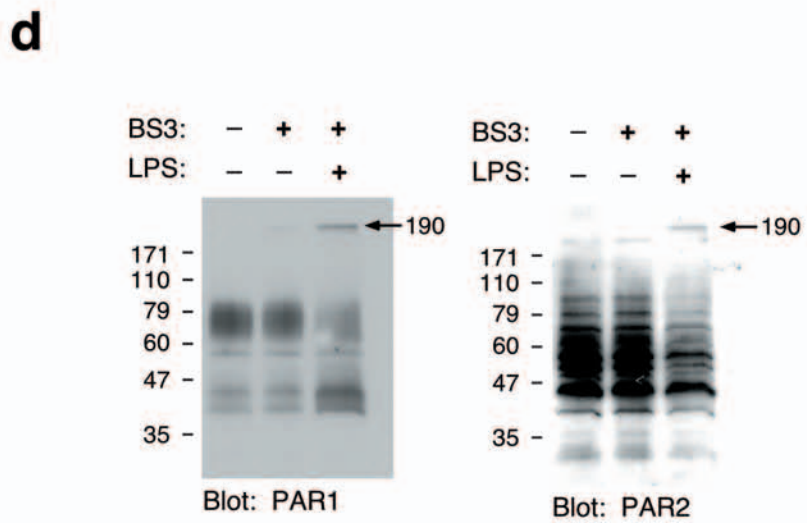

**Supplementary Figure 4. Detection of Complexes of PAR1 and PAR2 by FRET Microscopy and Chemical Crosslinking of LPS-stimulated Endothelial Cells. (a,b)**

EA.hy926 endothelial cells were transfected with PAR1-YFP and/or PAR2-CFP and stimulated with either LPS or PBS buffer for the indicated times and confocal photobleaching FRET microscopy was performed as in **Fig. 7f** and are representative of 10-15 cells for each condition. (c) The ratio of the membrane/cytosol FRET signal (highest 5–10% intensity) emanating from EA.hy926 endothelial cells (n=10-16) co-transfected with PAR1-YFP and PAR2-CFP treated with buffer or LPS as in **Fig. 7f**. (d) Cross-linking of PAR1-PAR2 complexes from LPS-stimulated EA.hy926 endothelial cells with non-cell permeant bis(sulfosuccinimidyl)suberate (BS3). EA.hy926 cells were treated with 1  $\mu$ g/ml LPS or PBS (-) for 4 h, crosslinked with 1 mM BS3 for 30 min, then quenched with 10 mM ethanolamine plus 1 M Tris-HCl. Cell lysates were separated by 12% SDS-PAGE, and immunoblot analysis was conducted with ATAP2 (PAR1-monoclonal) and SLIGK (PAR2-polyclonal) antibodies. This experiment was conducted 3 times and gave similar results.



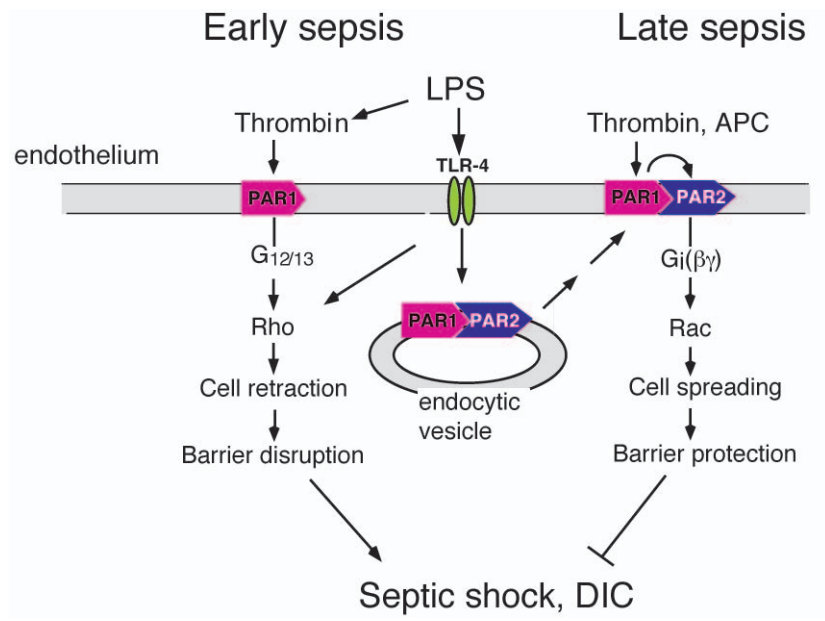

Supplementary Figure 5. Proposed Model of the PAR1-PAR2  
Transactivation Switch Mechanism in Endothelial Cells During  
Sepsis
